# Supplementary material for: Systematic investigation of CO2 : NH3 ice mixtures using mid-IR and VUV spectroscopy – part 2: electron irradiation and thermal processing
Source: Royal Society of Chemistry journal article supplement (doi:10.1039/d1ra05600j), 2021-01-01
Supplement: d1ra05600j1.pdf [file d1ra05600j1.pdf]

# ESI: Systematically investigating CO<sub>2</sub> : NH<sub>3</sub> ice mixtures using mid-IR and VUV spectroscopy - Part 2: electron and thermal processing

Rachel L. James, Sergio Ioppolo, Søren V. Hoffmann, Nykola C. Jones, Nigel J. Mason and Anita Dawes

## S1 Experimental

**Table S1** The film thickness of samples used and normalisation factor applied in the presented experiments. See text for details. Mid-IR spectra were normalised to a thickness of 300 nm and VUV spectra were normalised to a thickness of 200 nm.

| Spectroscopic study | Ratio | Sample thickness (nm) | Normalisation factor |
|---------------------|-------|-----------------------|----------------------|
| Mid-IR              | 1:0   | 475                   | 0.84                 |
|                     | 4:1   | 382                   | 1.05                 |
|                     | 2:1   | 424                   | 0.94                 |
|                     | 1:1   | 398                   | 1.01                 |
|                     | 1:2   | 470                   | 0.85                 |
|                     | 1:5   | 476                   | 0.84                 |
|                     | 1:10  | 455                   | 0.88                 |
|                     | 0:1   | 418                   | 0.96                 |
| VUV                 | 1:0   | 284                   | 0.70                 |
|                     | 4:1   | 237                   | 0.84                 |
|                     | 2:1   | 227                   | 0.88                 |
|                     | 1:3   | 154                   | 1.30                 |
|                     | 0:1   | 119                   | 1.68                 |

### S1.1 Electron penetration depth: CASINO user inputs

Table S2 gives the weighted density of the CO<sub>2</sub>:NH<sub>3</sub> mixtures input into CASINO and the corresponding estimated penetration depths. A weighted density was calculated for mixtures of CO<sub>2</sub>:NH<sub>3</sub> ices and was dependent on the fractional proportion of NH<sub>3</sub> (a) and the fractional proportion of CO<sub>2</sub> (b) of the stoichiometric mixture:

$$\rho_m = (a \times \rho_{NH_3}) + (b \times \rho_{CO_2}) \quad (1)$$

where  $\rho_{NH_3}$  is the density of pure NH<sub>3</sub> ice (0.74 g cm<sup>-3</sup>)<sup>1</sup> and  $\rho_{CO_2}$  is the density of pure CO<sub>2</sub> ice (1.11 g cm<sup>-3</sup>).<sup>1</sup>

## SPECTRA

**Table S2** CASINO estimated 1 keV electron penetration depth.

| Spectroscopic study | Ratio | Density (g cm <sup>-3</sup> ) | Penetration depth (nm) |
|---------------------|-------|-------------------------------|------------------------|
| Mid-IR              | 1:0   | 1.11                          | 61                     |
|                     | 4:1   | 1.06                          | 54                     |
|                     | 2:1   | 1.02                          | 64                     |
|                     | 1:1   | 0.98                          | 57                     |
|                     | 1:2   | 0.93                          | 78                     |
|                     | 1:5   | 0.89                          | 74                     |
|                     | 1:10  | 0.86                          | 64                     |
| VUV                 | 0:1   | 0.74                          | 84                     |
|                     | 1:0   | 1.11                          | 60                     |
|                     | 4:1   | 1.06                          | 55                     |
|                     | 2:1   | 1.02                          | 68                     |
|                     | 1:3   | 0.91                          | 64                     |
|                     | 0:1   | 0.74                          | 65                     |

## S2 Additional mid-IR spectra

### S2.1 Deposition at 20 K

**Table S3** Band assignments and positions of the vibrational modes of pure CO<sub>2</sub>, pure NH<sub>3</sub> and unirradiated CO<sub>2</sub>:NH<sub>3</sub> mixtures deposited at 20 K before irradiation with 1 keV electrons.

| Molecule                                 | Vib. Mode      | Assignment             | Ref. | Position (cm <sup>-1</sup> ) |      |      |      |      |      |      |      |
|------------------------------------------|----------------|------------------------|------|------------------------------|------|------|------|------|------|------|------|
|                                          |                |                        |      | 1:0                          | 4:1  | 2:1  | 1:1  | 1:2  | 1:5  | 1:10 | 0:1  |
| CO <sub>2</sub>                          | $\nu_1+\nu_3$  | combination            | 2    | 3709                         | 3702 | 3701 | 3701 | 3700 | 3698 | 3698 |      |
|                                          | $2\nu_2+\nu_3$ | combination            | 2    | 3601                         | 3596 | 3595 | 3594 | 3593 | 3592 | 3591 |      |
|                                          | $\nu_3$        | C–O asym. stretch (LO) | 3    | 2380                         | 2374 | 2369 | 2367 | 2360 | 2362 |      |      |
|                                          | $\nu_3$        | C–O asym. stretch (TO) | 2,3  | 2345                         | 2335 | 2335 | 2336 | 2338 | 2342 | 2343 |      |
| <sup>13</sup> CO <sub>2</sub>            | $\nu_3$        | asym. Stretch          | 2    | 2283                         | 2280 | 2279 | 2278 | 2278 | 2277 | 2277 |      |
| CO <sub>2</sub> :NH <sub>3</sub> complex |                |                        | 4    |                              | 3418 | 3414 | 3413 | 3405 |      |      |      |
|                                          |                |                        | 4    |                              | 3247 | 3249 | 3249 | 3248 | 3248 |      |      |
| NH <sub>3</sub>                          | $\nu_3$        | N–H asym. Stretch      | 5    |                              | 3387 | 3382 | 3381 | 3376 | 3373 | 3373 | 3377 |
|                                          | $2\nu_4$       | overtone               | 5    |                              | 3313 | 3313 | 3308 | 3310 | 3304 | 3292 | 3294 |
|                                          | $\nu_1$        | N–H sym. Stretch       | 5    |                              | 3222 | 3221 | 3220 | 3218 | 3216 | 3215 | 3213 |
|                                          | $\nu_4+\nu_L$  | combination            | 5    |                              |      |      |      |      | 1860 | 1861 | 1883 |
|                                          | $\nu_4$        | deformation            | 5    |                              | 1631 | 1630 | 1630 | 1627 | 1627 | 1626 | 1626 |
|                                          | $\nu_2$        | umbrella               | 5    |                              | 1062 | 1068 | 1067 | 1067 | 1072 | 1072 | 1073 |

## S2.1 Deposition at 20 K

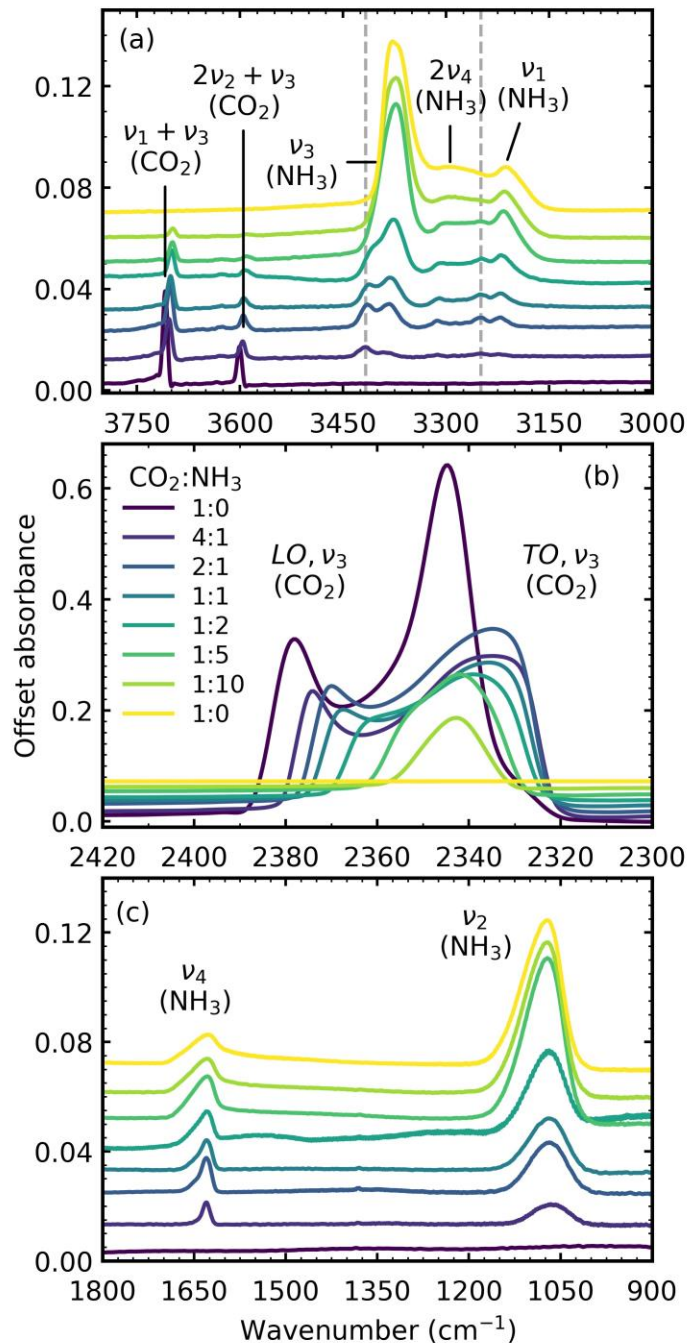

**Figure S1** Mid-IR spectra of CO<sub>2</sub>:NH<sub>3</sub> mixtures (4:1, 2:1, 1:1, 1:2, 1:5 & 1:10) deposited at 20 K compared with pure CO<sub>2</sub> (1:0) and pure NH<sub>3</sub> (0:1). **(a)** Dashed lines represent CO<sub>2</sub>:NH<sub>3</sub> molecular complex vibrational features. **(b)** LO-TO splitting of the  $\nu_3$  fundamental mode of CO<sub>2</sub>. **(c)** NH<sub>3</sub>  $\nu_4$  and  $\nu_2$  modes. Band assignments are given in Table S3. Spectra are offset on the y-axis for clarity and normalised to a thickness of 300 nm.

## S2.2 Electron processing at 20 K

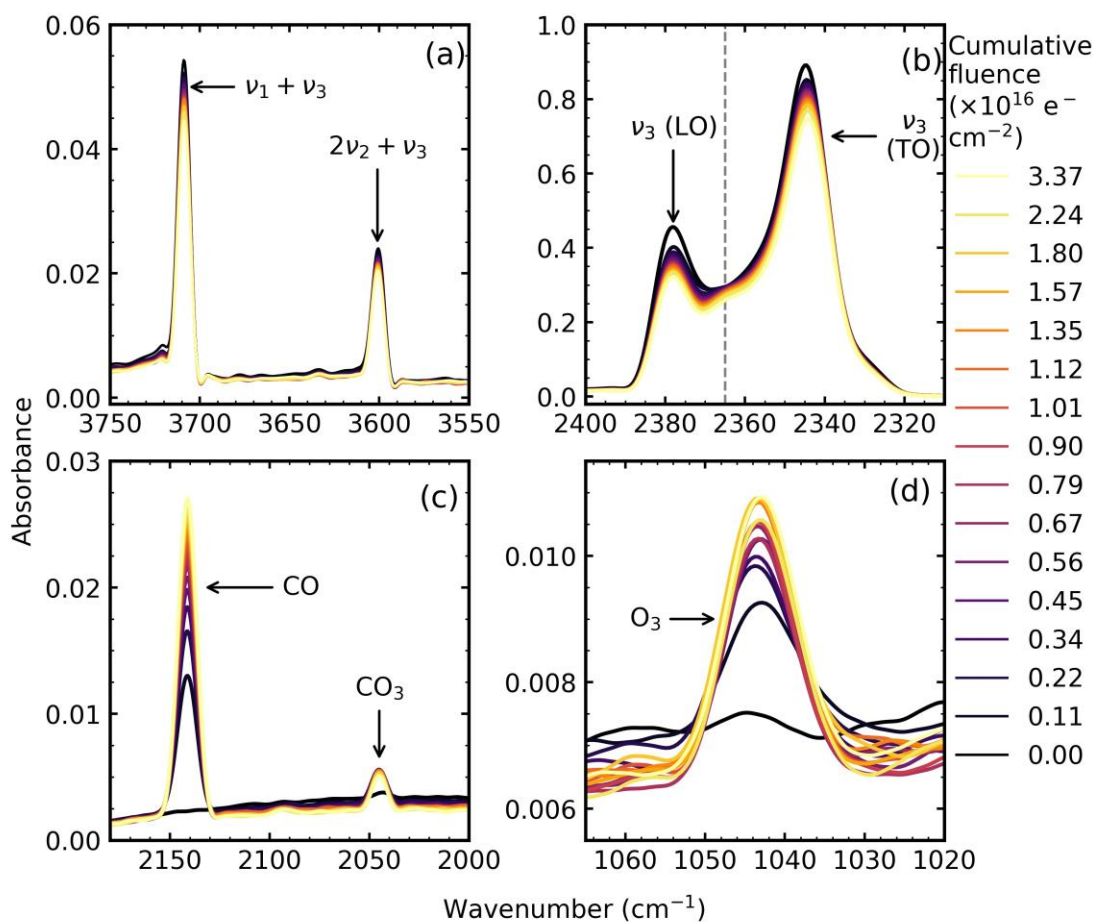

**Figure S2** Mid-IR spectra of pure CO<sub>2</sub> deposited at 20 K and then processed with 1 keV electrons at discrete intervals to a total fluence of  $3.37 \times 10^{16} \text{ e}^- \text{ cm}^{-2}$ . (a) CO<sub>2</sub> combination modes; (b) LO-TO splitting of the  $\nu_3$  mode; (c) Formation of CO and CO<sub>3</sub>; (d) Formation of O<sub>3</sub>.

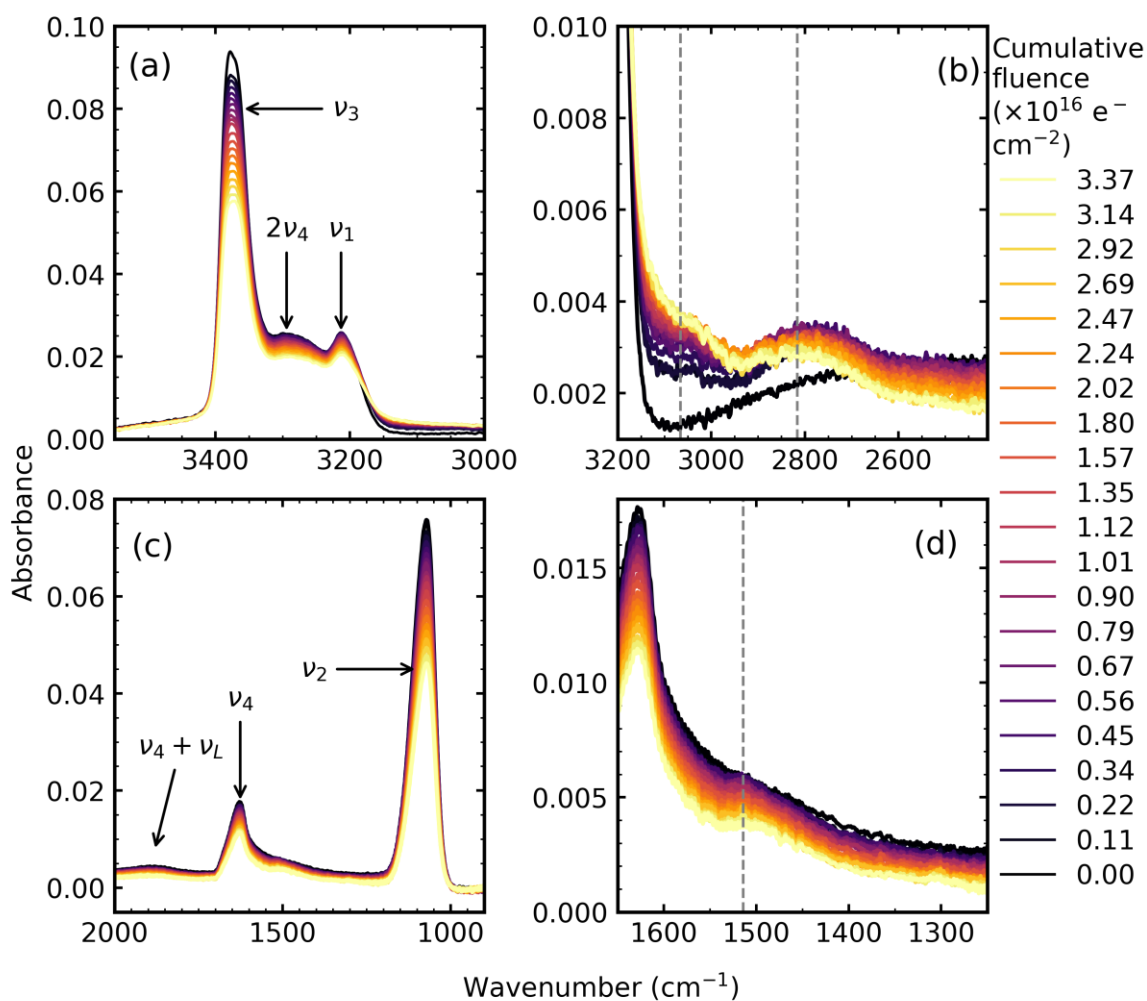

**Figure S3** Mid-IR spectra of pure  $\text{NH}_3$  deposited at 20 K and then processed with 1 keV electrons at discrete intervals to a total fluence  $3.37 \times 10^{16} \text{ e}^- \text{ cm}^{-2}$ . (a) N-H stretching region; (b) New features due to electron processing; (c)  $\nu_4 + \nu_L$ ,  $\nu_4$  and  $\nu_2$  modes; (d) New feature due to electron processing.

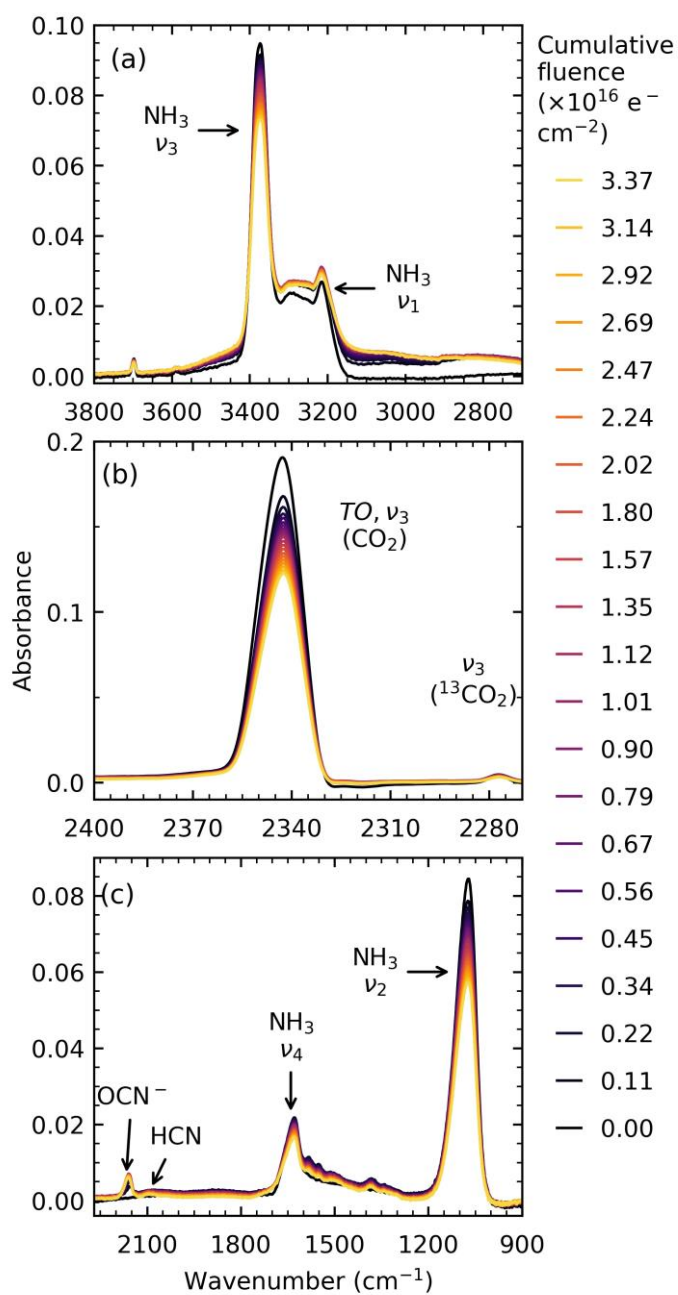

**Figure S4** Example mid-IR spectra of a  $\text{CO}_2:\text{NH}_3$  mixture in a 1:10 ratio irradiated with 1 keV electron at 20 K to a total fluence of  $3.37 \times 10^{16} \text{ e}^- \text{ cm}^{-2}$ . (a) O–H/N–H stretching region between 3500–2900  $\text{cm}^{-1}$ . (b) No observed LO–TO splitting of the  $\nu_3$  vibrational mode of  $\text{CO}_2$ . (c) Several new features formed including  $\text{OCN}^-$  &  $\text{HCN}$  and new absorptions between 1750–250  $\text{cm}^{-1}$ .

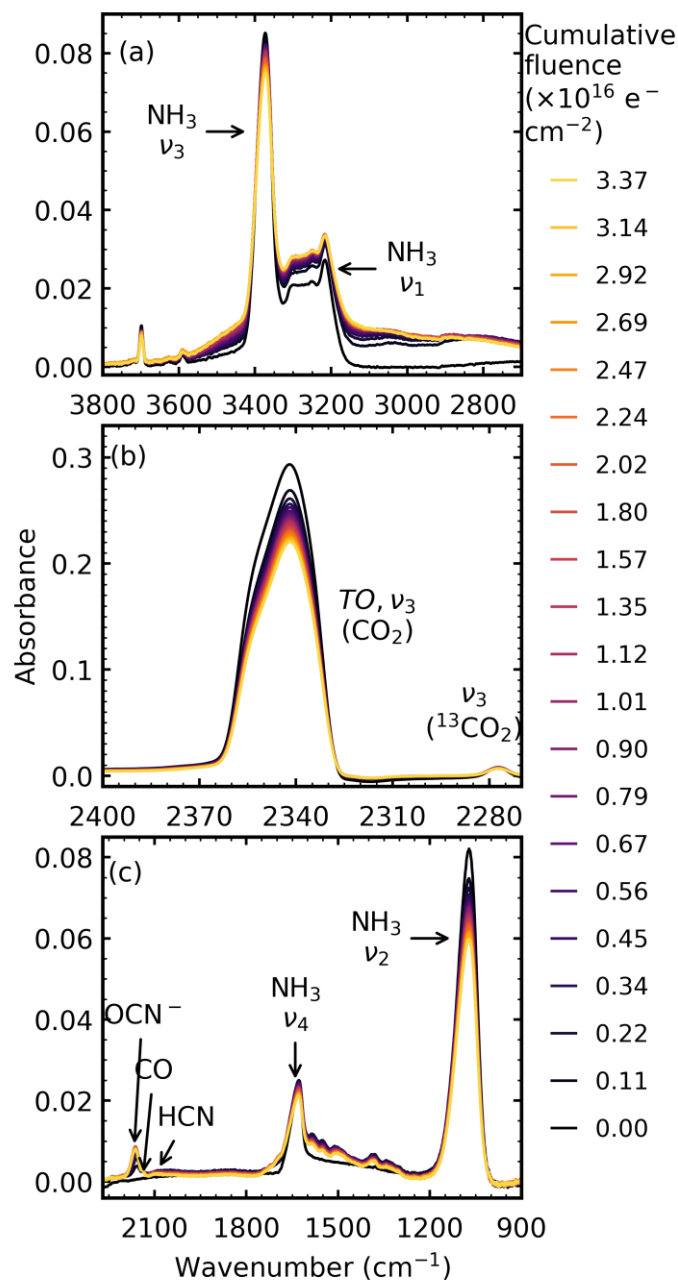

**Figure S5** Example mid-IR spectra of a  $\text{CO}_2:\text{NH}_3$  mixture in a 1:5 ratio irradiated with 1 keV electron at 20 K to a total fluence of  $3.37 \times 10^{16} \text{ e}^- \text{ cm}^{-2}$ . **(a)** O–H/N–H stretching region between 3500–2900  $\text{cm}^{-1}$ ; **(b)** LO-TO splitting of the  $\nu_3$  vibrational mode of  $\text{CO}_2$ ; **(c)** Several new features formed including  $\text{OCN}^-$ , CO & HCN and absorptions between 1750–1250  $\text{cm}^{-1}$ .

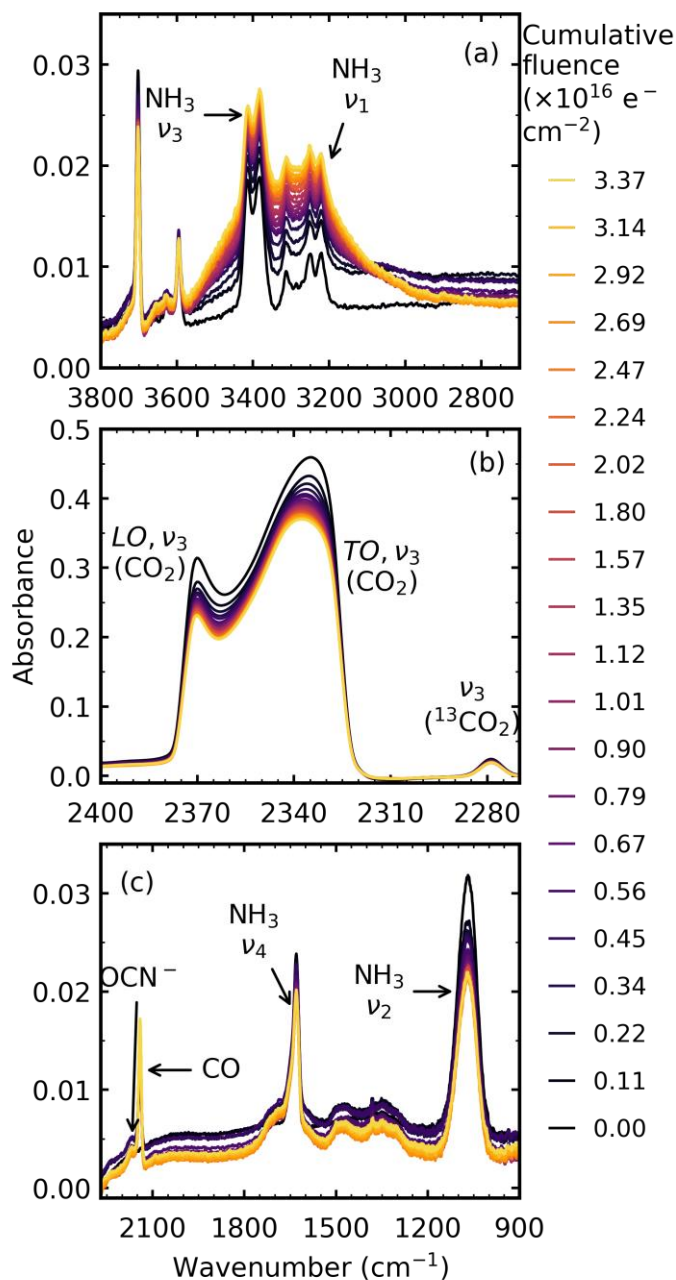

**Figure S6** Example mid-IR spectra of a  $\text{CO}_2:\text{NH}_3$  mixture in a 2:1 ratio irradiated with 1 keV electron at 20 K to a total fluence of  $3.37 \times 10^{16} \text{e}^- \text{cm}^{-2}$ . **(a)** O-H/N-H stretching region between 3500–2900  $\text{cm}^{-1}$ ; **(b)** LO-TO splitting of the  $\nu_3$  vibrational mode of  $\text{CO}_2$ ; **(c)** Several new features formed including  $\text{OCN}^-$ ,  $\text{CO}$  &  $\text{HCN}$  and absorptions between 1750–1250  $\text{cm}^{-1}$ .



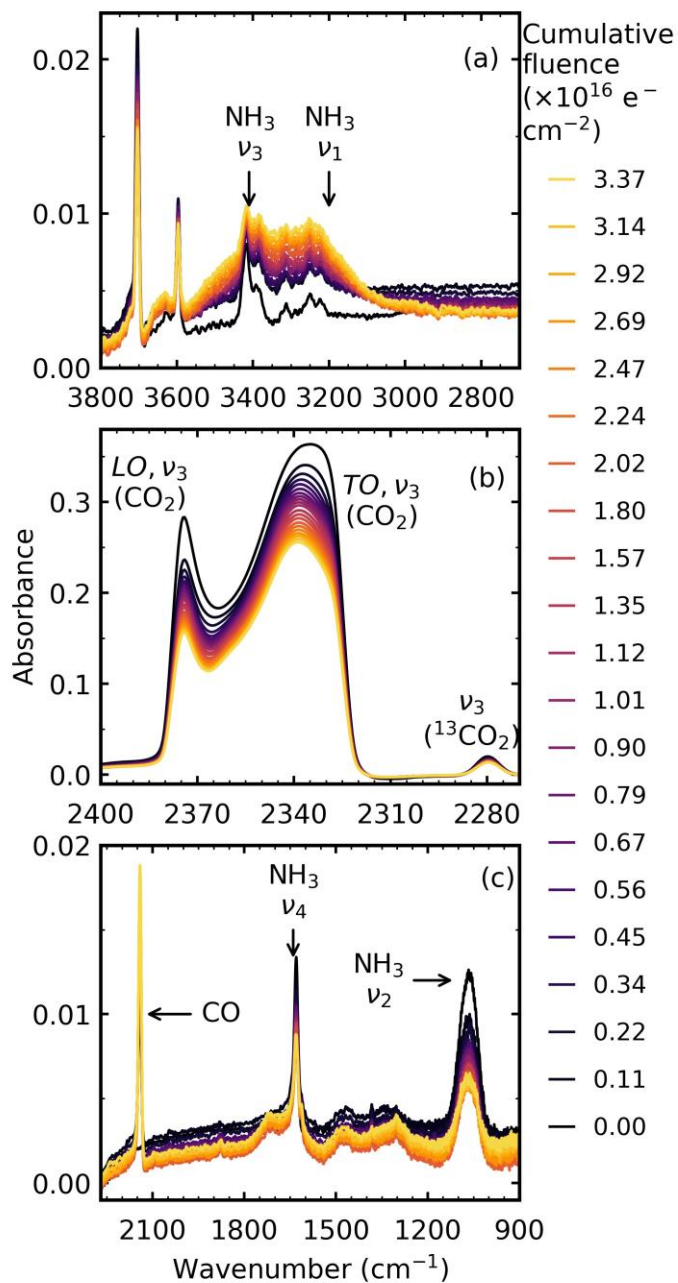

**Figure S7** Example mid-IR spectra of a  $\text{CO}_2:\text{NH}_3$  mixture in a 4:1 ratio irradiated with 1 keV electron at 20 K to a total fluence of  $3.37 \times 10^{16} \text{ e}^- \text{ cm}^{-2}$ . (a) O–H/N–H stretching region between 3500–2900  $\text{cm}^{-1}$ ; (b) LO–TO splitting of the  $\nu_3$  vibrational mode of  $\text{CO}_2$ ; (c) Several new features formed including  $\text{OCN}^-$ , CO & HCN and absorptions between 1750–1250  $\text{cm}^{-1}$ .

## S2.3 Thermal processing

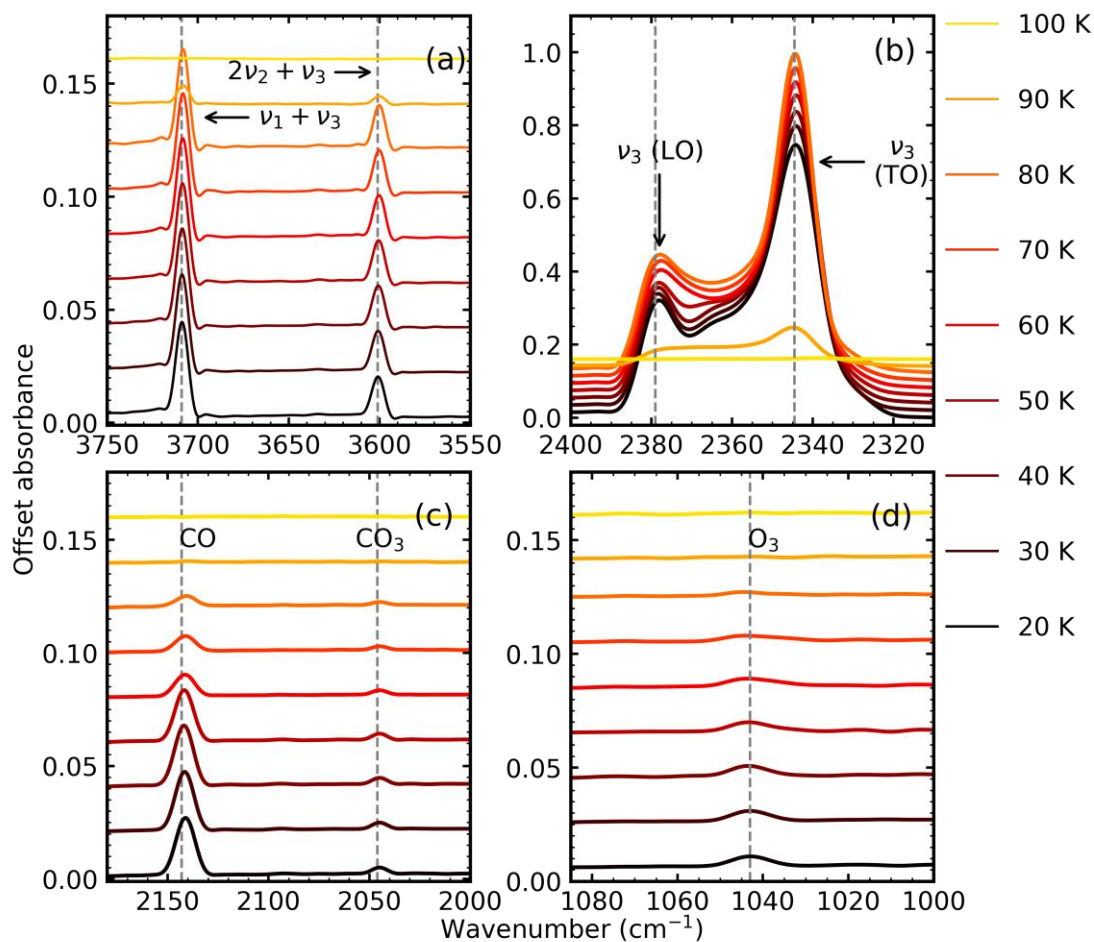

**Figure S8** Mid-IR spectra of the thermal processing of pure  $\text{CO}_2$  after deposition at 20 K and irradiation with 1 keV electrons to a fluence of  $3.37 \times 10^{16} \text{ e}^- \text{ cm}^{-2}$  at 20 K. Spectra are offset on the y-axis for clarity. **(a)**  $\text{CO}_2$  combination modes; **(b)** LO-TO splitting of the  $\nu_3$  mode; **(c)** CO and  $\text{CO}_3^-$ ; **(d)**  $\text{O}_3$ .

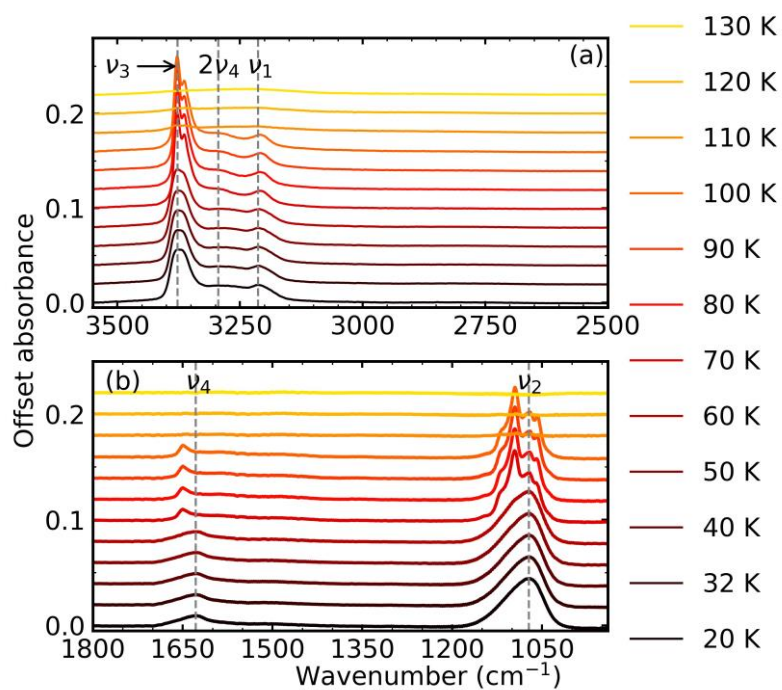

**Figure S9** Mid-IR spectra of the thermal processing of pure  $\text{NH}_3$  after deposition at 20 K and irradiation with 1 keV electrons to a fluence of  $3.37 \times 10^{16} \text{ e}^- \text{ cm}^{-2}$  at 20 K. Spectra are offset on the y-axis for clarity. **(a)** N-H stretching region; **(b)**  $\nu_4$  and  $\nu_2$  modes.

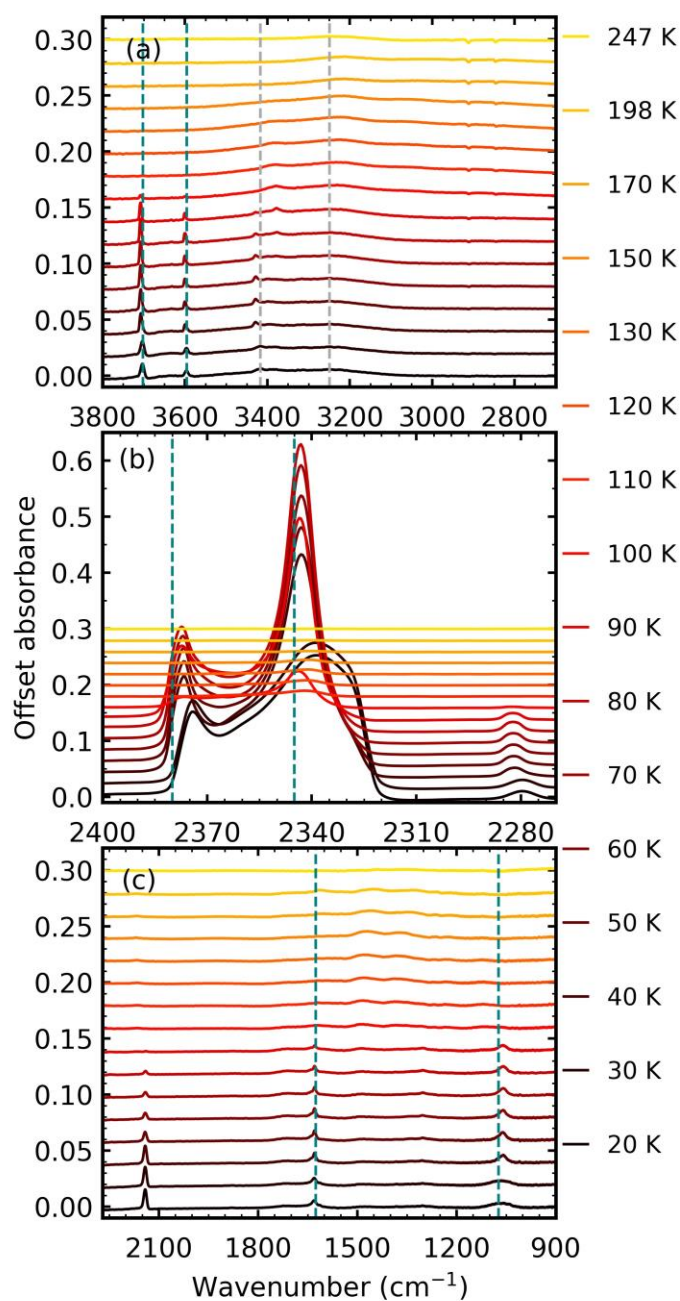

**Figure S10** Mid-IR spectra of the thermal processing results of a CO<sub>2</sub>:NH<sub>3</sub> mixture in a 4:1 ratio after deposition and irradiation with 1 keV electrons to a fluence of  $3.37 \times 10^{16} \text{ e}^- \text{ cm}^{-2}$  at 20 K. Spectra are offset on the y-axis for clarity. **(a)** Segregation of the mixture was observed through the shift in position of the CO<sub>2</sub> vibrational modes towards pure CO<sub>2</sub> position which are indicated by blue dashed lines. Grey dashed lines indicate CO<sub>2</sub>:NH<sub>3</sub> molecular complex vibrational modes which disappeared between 60–70 K. **(b)** LO-TO splitting of the  $\nu_3$  vibrational mode of CO<sub>2</sub>. **(c)** Thermally induced reaction at 80 K.

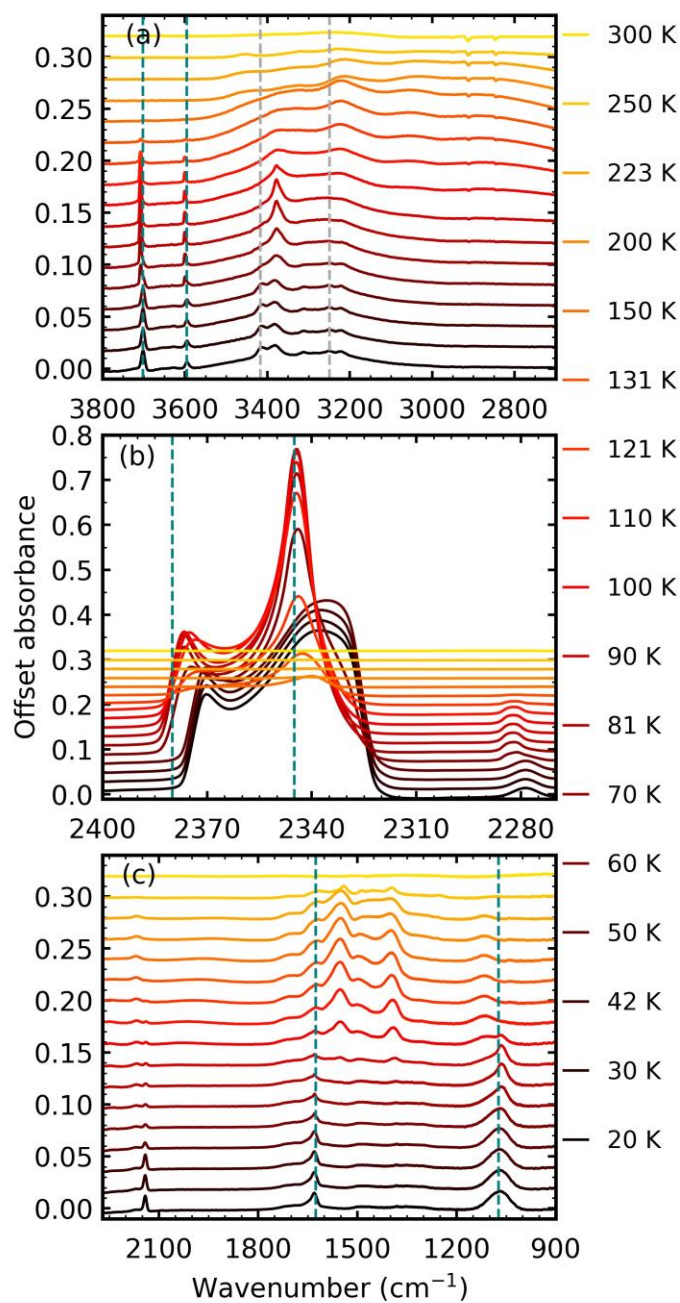

**Figure S11** Mid-IR spectra of the thermal processing results of a CO<sub>2</sub>:NH<sub>3</sub> mixture in a 2:1 ratio after deposition and irradiation with 1 keV electrons to a fluence of  $3.37 \times 10^{16} \text{ e}^- \text{ cm}^{-2}$  at 20 K. Spectra are offset on the y-axis for clarity. **(a)** Segregation of the mixture was observed through the shift in position of the CO<sub>2</sub> vibrational modes towards pure CO<sub>2</sub> position which are indicated by blue dashed lines. Grey dashed lines indicate CO<sub>2</sub>:NH<sub>3</sub> molecular complex vibrational modes which disappeared between 60–70 K. **(b)** LO-TO splitting of the  $\nu_3$  vibrational mode of CO<sub>2</sub>. **(c)** Thermally induced reaction at 80 K.

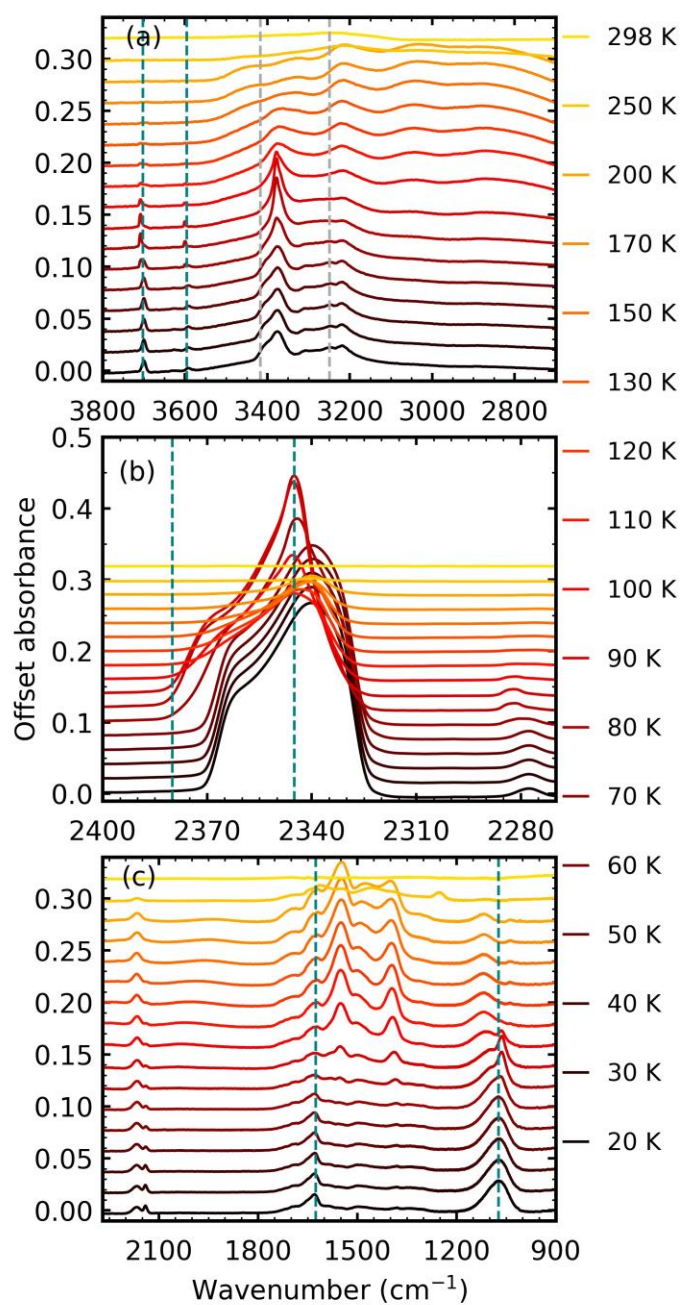

**Figure S12** Mid-IR spectra of the thermal processing results of a CO<sub>2</sub>:NH<sub>3</sub> mixture in a 1:2 ratio after deposition and irradiation with 1 keV electrons to a fluence of  $3.37 \times 10^{16} \text{ e}^- \text{ cm}^{-2}$  at 20 K. Spectra are offset on the y-axis for clarity. **(a)** Segregation of the mixture was observed through the shift in position of the CO<sub>2</sub> vibrational modes towards pure CO<sub>2</sub> position which are indicated by blue dashed lines. Grey dashed lines indicate CO<sub>2</sub>:NH<sub>3</sub> molecular complex vibrational modes which disappeared between 60–70 K. **(b)** LO-TO splitting of the  $\nu_3$  vibrational mode of CO<sub>2</sub>. **(c)** Thermally induced reaction at 80 K.

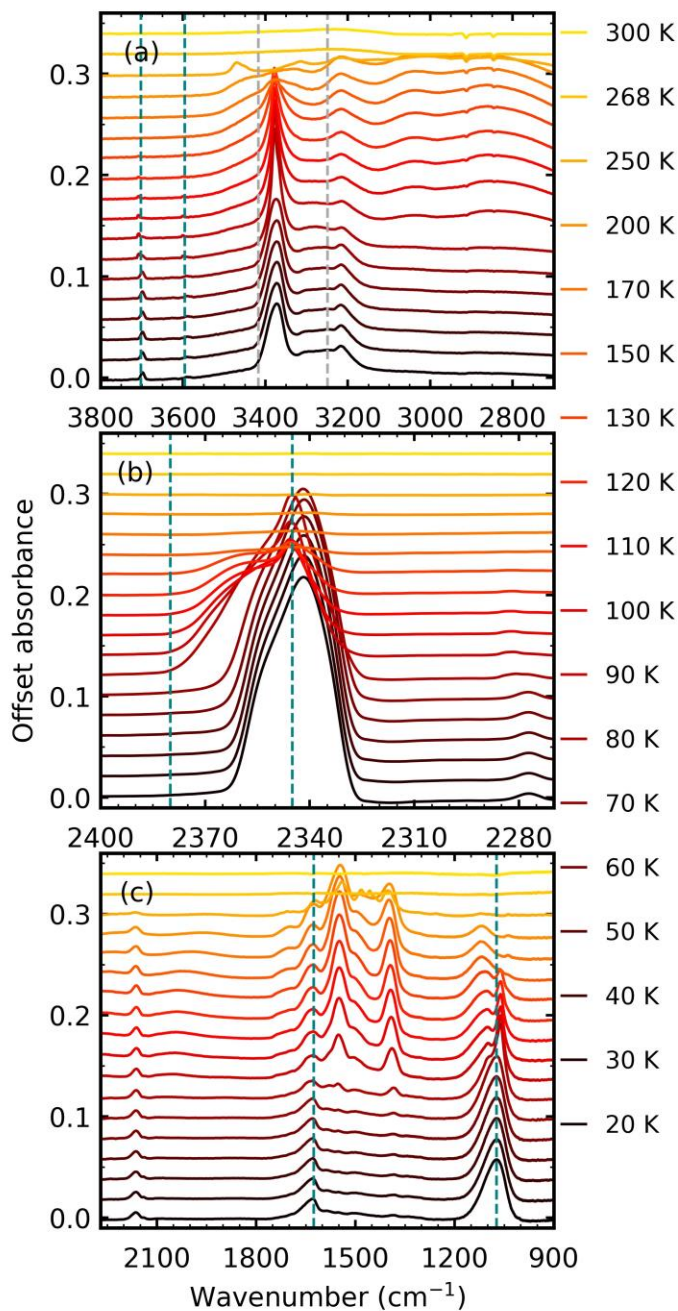

**Figure S13** Mid-IR spectra of the thermal processing results of a  $\text{CO}_2:\text{NH}_3$  mixture in a 1:5 ratio after deposition and irradiation with 1 keV electrons to a fluence of  $3.37 \times 10^{16} \text{ e}^- \text{ cm}^{-2}$  at 20 K. Spectra are offset on the y-axis for clarity. **(a)** Segregation of the mixture was observed through the shift in position of the  $\text{CO}_2$  vibrational modes towards pure  $\text{CO}_2$  position which are indicated by blue dashed lines. Grey dashed lines indicate  $\text{CO}_2:\text{NH}_3$  molecular complex vibrational modes which disappeared between 60–70 K. **(b)** LO-TO splitting of the  $\nu_3$  vibrational mode of  $\text{CO}_2$ . **(c)** Thermally induced reaction at 80 K.

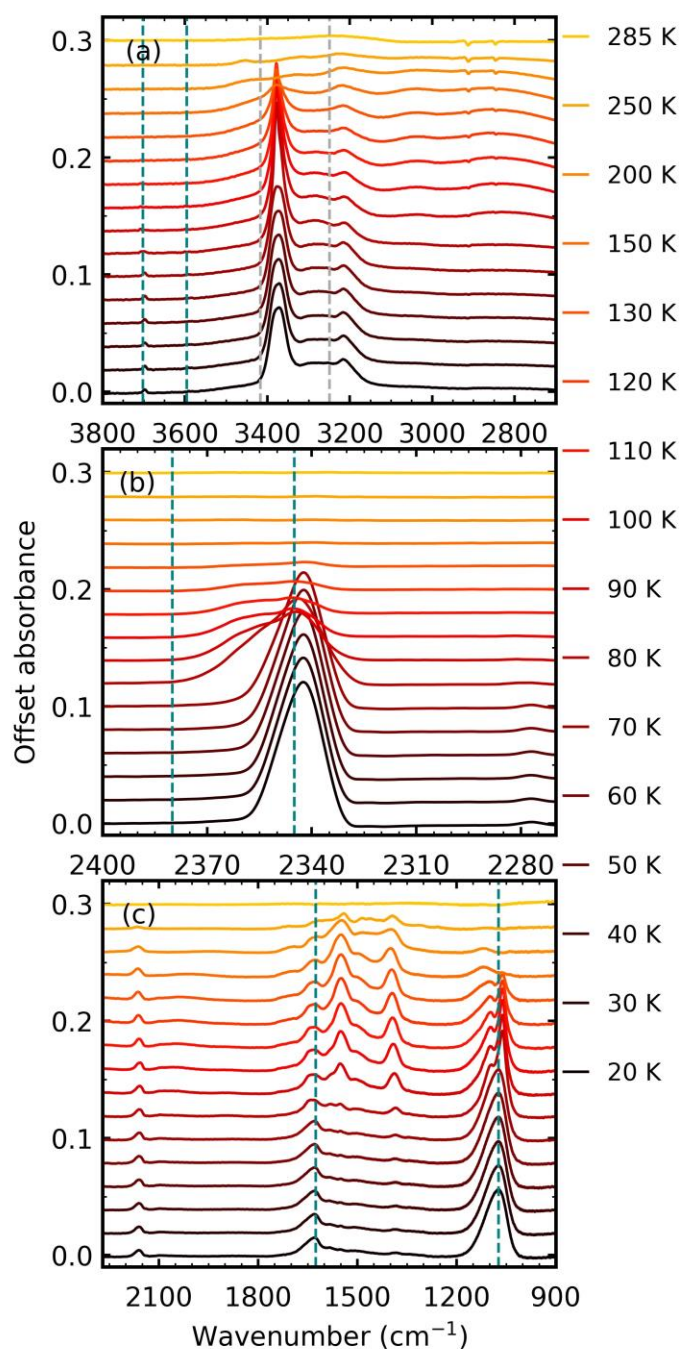

**Figure S14** Mid-IR spectra of the thermal processing results of a  $\text{CO}_2:\text{NH}_3$  mixture in a 1:10 ratio after deposition and irradiation with 1 keV electrons to a fluence of  $3.37 \times 10^{16} \text{ e}^- \text{ cm}^{-2}$  at 20 K. Spectra are offset on the y-axis for clarity. **(a)** Segregation of the mixture was observed through the shift in position of the  $\text{CO}_2$  vibrational modes towards pure  $\text{CO}_2$  position which are indicated by blue dashed lines. Grey dashed lines indicate  $\text{CO}_2:\text{NH}_3$  molecular complex vibrational modes which disappeared between 60–70 K. **(b)** LO-TO splitting of the  $\nu_3$  vibrational mode of  $\text{CO}_2$ . **(c)** Thermally induced reaction at 80 K.



## S3 Additional VUV spectra

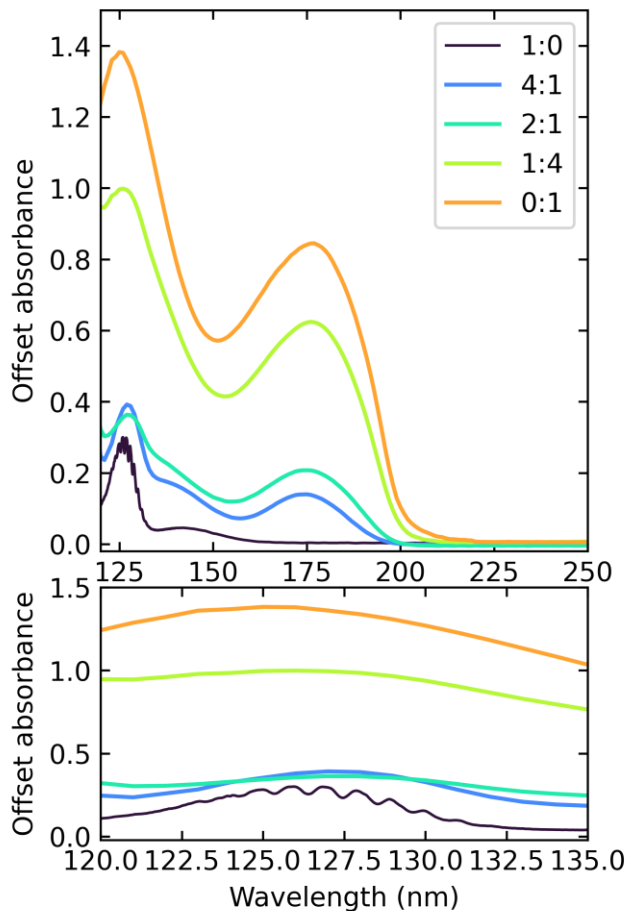

**Figure S15** VUV spectra of  $\text{CO}_2:\text{NH}_3$  mixtures (4:1, 2:1 & 1:3) compared with pure  $\text{CO}_2$  (1:0) and pure  $\text{NH}_3$  (0:1) between 120–340 nm (top plot). Bottom plot shows a close up of the region between 120–135 nm. Normalised to a thickness of 200 nm.

## Notes and references

- [1] M. Bouilloud, N. Fray, Y. Bénilan, H. Cottin, M.-C. Gazeau and A. Jolly, *Mon. Not. R. Astron. Soc.*, 2015, 451, 2145–2160.
- [2] P. A. Gerakines, W. A. Schutte, J. M. Greenberg and E. F. van Dishoeck, *Astron. Astrophys.*, 1995, 296, 810.
- [3] G. A. Baratta and M. E. Palumbo, *J. Opt. Soc. Am. A*, 1998, 15, 3076–3085.
- [4] J. B. Bossa, F. Duvernay, P. Theulé, F. Borget and T. Chiavassa, *Chem. Phys.*, 2008, 354, 211–217.
- [5] F. P. Reding and D. F. Hornig, *J. Chem. Phys.*, 1951, 19, 594–601.
